# Supplementary material for: Gene–Environment Interactions at Nucleotide Resolution
Source: PLoS Genet. 2010 Sep 30;6(9):e1001144. doi: 10.1371/journal.pgen.1001144 (PMC2947989; doi:10.1371/journal.pgen.1001144)
Supplement: Table S5 — The residual degrees-of-freedom and adjusted r2 of linear models of sporulation efficiency with varying levels of interaction terms. (0.02 MB XLS) [file pgen.1001144.s009.xls]

## Sheet: table_Model_Selection.txt
Table S5. The residual degrees-of-freedom and adjusted r2 of linear models of sporulation efficiency with varying levels of interaction terms.
	Additive Model	Two-Way Interactions	All Three-way Interactions	Stepwise Regression	Final Model	Four-way Interactions	Five-way Interactions
adjusted r2	0.874369	0.944709	0.979916	0.965	0.963191	0.986379	0.990272
residual df	754	719	659	684	697	604	578
